1           **Domain-specific working memory, but not dopamine-related**  
2                   **genetic variability, shapes reward-based motor learning**

3

4                   Running title: Underlying mechanisms of reward-based motor learning

5

6           **Olivier Codol\*<sup>1</sup>, Peter Holland\*<sup>1</sup>, Elizabeth Oxley<sup>1</sup>, Maddison Taylor<sup>1</sup>, Elizabeth**  
7                   **Hamshere<sup>1</sup>, Shadiq Joseph<sup>1</sup>, Laura Huffer<sup>1</sup>, Joseph M. Galea<sup>1</sup>**

8

9           <sup>1</sup>*School of Psychology, University of Birmingham, Edgbaston, Birmingham, B15 2TT, UK*

10

11   \* = These authors provided equal contribution to this work

12

13   Number of Figures: 6

14   Number of Tables: 4

15   Number of Pages: 39

16   Words: Abstract = 249           Introduction = 647           Discussion = 1498

17

18   Keywords: Explicit control, Motor adaptation, Reinforcement, Retention

19

20   Acknowledgements: This work was supported by the European Research Council starting  
21   grant: MotMotLearn (637488)

22

23   Correspondence should be addressed to:

24   Peter Holland

25   Email: P.J.Holland@bham.ac.uk

## 26 **Abstract**

27 The addition of rewarding feedback to motor learning tasks has been shown to increase the  
28 retention of learning, spurring interest in the possible utility for rehabilitation. However,  
29 laboratory-based motor tasks employing rewarding feedback have repeatedly been shown to  
30 lead to great inter-individual variability in performance. Understanding the causes of such  
31 variability is vital for maximising the potential benefits of reward-based motor learning. Thus,  
32 in this pre-registered study, we assessed whether spatial (SWM), verbal (VWM) and mental  
33 rotation (RWM) working memory capacity as well as dopamine-related genetic profiles could  
34 predict performance in two reward-based motor tasks, using a large cohort of participants  
35 (N=241). The first task assessed participant's ability to follow a hidden and slowly shifting  
36 reward region based on hit/miss (binary) feedback. The second task investigated participant's  
37 capacity to preserve performance with binary feedback after adapting to the shift with full  
38 visual feedback. Our results demonstrate that SWM strongly predicts a participant's capacity  
39 to reliably reproduce a successful motor action, measured as change in reach angle following  
40 reward, while RWM predicted a participant's propensity to express an explicit strategy when  
41 required to make large adjustments in reach angle. Therefore, both SWM and RWM were  
42 reliable predictors of success during reward-based motor learning. Change in reach direction  
43 following failure was also a strong predictor of success rate, although we observed no  
44 consistent relationship with any type of working memory. Surprisingly, no dopamine-related  
45 genotypes predicted performance. Therefore, working memory capacity plays a pivotal in  
46 determining individual ability in reward-based motor learning.

47

## 48 **Significance statement**

49 Reward-based motor learning tasks have repeatedly been shown to lead to idiosyncratic  
50 behaviours that cause varying degrees of task success. Yet, the factors determining an

51 individual's capacity to use reward-based feedback are unclear. Here, we assessed a wide  
52 range of possible candidate predictors, and demonstrate that domain-specific working  
53 memory plays an essential role in determining individual capacity to use reward-based  
54 feedback. Surprisingly, genetic variations in dopamine availability were not found to play a  
55 role. This is in stark contrast with seminal work in the reinforcement and decision-making  
56 literature, which show strong and replicated effects of the same dopaminergic genes in  
57 decision-making. Therefore, our results provide novel insights in reward-based motor  
58 learning, highlighting a key role for domain-specific working memory capacity.

59

## 60 **Introduction**

61 When performing motor tasks under altered environmental conditions, adaptation to the new  
62 constraints occurs through the recruitment of a variety of systems (Taylor and Ivry, 2014).  
63 Arguably the most studied of those systems is cerebellum-dependent adaptation, which  
64 consists of the implicit and automatic recalibration of mappings between actual and expected  
65 outcomes, through sensory prediction errors (Morehead et al., 2017; Tseng et al., 2007).  
66 Besides cerebellar adaptation, other work has demonstrated the involvement of a more  
67 cognitive, deliberative process whereby motor plans are adjusted based on an individual's  
68 structural understanding of the task (Bond and Taylor, 2015; Taylor and Ivry, 2011). We  
69 label this process as explicit control (Codol et al., 2018; Holland et al., 2018) but it has also  
70 been referred to as strategy (Taylor and Ivry, 2011) or explicit re-aiming (Morehead et al.,  
71 2015). Recently it has been proposed that reinforcement learning, whereby the memory of  
72 successful or unsuccessful actions are strengthened or weakened, respectively, may also play  
73 a role (Huang et al., 2011; Izawa and Shadmehr, 2011; Shmuelof et al., 2012). Such reward-  
74 based reinforcement has been assumed to be an implicit and automatic process (Haith and  
75 Krakauer, 2013). However, recent evidence suggests that phenomena attributed to

76 reinforcement-based learning during visuomotor rotation tasks can largely be explained  
77 through explicit processes (Codol et al., 2018; Holland et al., 2018).

78

79 One outstanding feature of reinforcement-based motor learning is the great variability  
80 expressed across individuals (Codol et al., 2018; Holland et al., 2018; Therrien et al., 2016,  
81 2018). What factors underlie such variability? If reinforcement is indeed explicitly grounded,  
82 it could be argued that individual working memory (WM) capacity, which reliably predicts  
83 propensity to employ explicit control in classical motor adaptation tasks (Anguera et al.,  
84 2010; Christou et al., 2016; Sidarta et al., 2018), would also predict performance in a  
85 reinforcement-based motor learning task. If so, this would strengthen the proposal that reward  
86 based motor learning bears a strong explicit component. Anguera et al., (2010) demonstrated  
87 that mental rotation WM (RWM) specifically, unlike other forms of working memory such as  
88 verbal working memory (VWM), correlates with explicit control. More recently, Christou et  
89 al. (2016) reported a similar correlation with spatial WM (SWM).

90

91 Another potential contributor to this variability is genetic profile. In previous work from our  
92 group (Codol et al., 2018; Holland et al., 2018), we argue that reinforcement-based motor  
93 learning performance relies on a balance between exploration and exploitation of the task  
94 space, a feature reminiscent of structural learning and reinforcement-based decision-making  
95 (Daw et al., 2005; Frank et al., 2009; Sutton and Barto, 1998). A series of studies from Frank  
96 and colleagues suggests that individual tendencies to express explorative versus exploitative  
97 behaviour can be predicted based on dopamine-related genetic profile (Doll et al., 2016;  
98 Frank et al., 2007, 2009). Reinforcement has consistently been linked to dopaminergic  
99 function in a variety of paradigms, and thus, such a relationship could also be expected in  
100 reward-based motor learning (Pekny et al., 2015). Specifically, Frank and colleagues focused

101 on Catecholamine-O-Methyl-Transferase (COMT), Dopamine- and cAMP-Regulated  
102 neuronal Phosphoprotein (DARPP32) and Dopamine Receptor D2 (DRD2), and suggest a  
103 distinction between COMT-modulated exploration and DARPP32- and DRD2-modulated  
104 exploitation (Frank et al., 2009).

105

106 Consequently, we investigated the influence of WM capacity (RWM, SWM and VWM) and  
107 genetic variations in dopamine metabolism (DRD2, DARPP32, COMT) on an individual's  
108 ability to perform under reward-based motor learning conditions. We examined this using  
109 two established reward-based motor learning tasks. First, a gradual task (Holland et al., 2018)  
110 required participants to learn to adjust the angle at which they reached to a slowly and  
111 secretly shifting reward region (Acquire); second, an abrupt task (Codol et al., 2018;  
112 Shmuelof et al., 2012) required participants to preserve performance with reward-based  
113 feedback after adapting to a visuomotor rotation (Preserve). The use of these two tasks  
114 enabled us to examine whether similar predictors of performance explained participant's  
115 capacity to acquire and preserve behaviour with reward-based feedback.

116

## 117 **Methods**

118 Prior to the start of data collection, the sample size, variables of interest and analysis method  
119 were pre-registered. The pre-registered information, data and analysis code can be found  
120 online at <https://osf.io/j5v2s/> and <https://osf.io/rmwc2/> for the Preserve and Acquire tasks,  
121 respectively.

## 122 **Participants**

123 121 (30 male, mean age: 21.06, range: 18-32) and 120 (16 male, mean age: 19.24, range: 18-  
124 32) participants were recruited for the Acquire and Preserve tasks, respectively. All  
125 participants provided informed consent and were remunerated with either course credit or

126 money (£7.50/hour). All participants were free of psychological, cognitive, motor or  
127 uncorrected visual impairment. The study was approved by and performed in accordance  
128 with the local research ethics committee of the University of Birmingham, UK.

### 129 **General procedure**

130 Participants were seated before a horizontally fixed mirror reflecting a screen placed above,  
131 on which visual stimuli were presented. This arrangement resulted in the stimuli appearing at  
132 the level on which participants performed their reaching movements. The Acquire (gradual)  
133 and Preserve (abrupt) tasks were performed on two different stations, with a KINARM  
134 (BKIN Technology, London, Ontario; sampling rate: 1000Hz) and a Polhemus 3SPACE  
135 Fastrak tracking device (Colchester, Vermont U.S.A.; sampling rate: 120Hz), employed  
136 respectively. The Acquire task was run using Simulink (The Mathworks, Natwick, MA) and  
137 Dexterit-E (BKIN Technology), while the Preserve task was run using Matlab (The  
138 Mathworks, Natwick, MA) and Psychophysics toolbox (Brainard, 1997). The Acquire task  
139 employed the same paradigm and equipment as Holland et al. (2018), with the exception of  
140 the maximum reaction time (RT) which was increased from 0.6s to 1s, and the maximum  
141 movement time (MT) which was reduced from 1s to 0.6s. The Preserve task used the same  
142 setup and display as in Codol et al. (2018); however, the number of ‘refresher’ trials during  
143 the binary feedback (BF) blocks was increased from one to two in every 10 trials. The  
144 designs were kept as close as possible to their respective original publications to promote  
145 replication and comparability across studies. In both tasks reaching movements were made  
146 with the dominant arm.

### 147 **Reaching tasks**

148 *Acquire task.* Participants performed 670 trials, each of which followed a stereotyped  
149 timeline. The starting position for each trial was in a consistent position roughly 30cm in  
150 front of the midline and was indicated by a red circle (1cm radius). After holding the position

151 of the handle within the starting position, a target (red circle, 1cm radius) appeared directly in  
152 front of the starting position at a distance of 10cm. Participants were instructed to make a  
153 rapid ‘shooting’ movement that passed through the target. If the cursor position at a radial  
154 distance of 10cm was within a reward region ( $\pm 5.67^\circ$ , initially centred on the visible target;  
155 grey region in Figure 1a) the target changed colour from red to green and a green tick was  
156 displayed just above the target position, informing participants of the success of their  
157 movement. If, however, the cursor did not pass through the reward region, the target  
158 disappeared from view and no tick was displayed, signalling failure (binary feedback). After  
159 each movement, the robot returned to the starting position and participants were instructed to  
160 passively allow this.

161 For the first 10 trials, the position of the robotic handle was displayed as a white cursor (0.5  
162 cm radius) on screen, following this practice block the cursor was extinguished for the  
163 remainder of the experiment and participants only received binary feedback. The baseline  
164 block consisted of the first 40 trials under binary feedback, during this period the reward  
165 region remained centred on the visible target. Subsequently, unbeknownst to the participant  
166 the reward region rotated in steps of  $1^\circ$  every 20 trials; the direction of rotation was  
167 counterbalanced across participants. After reaching a rotation of  $25^\circ$  the reward region was  
168 held constant for an additional 20 trials. Performance during these last 20 trials was used to  
169 determine overall task success. Subsequently, binary feedback was removed, and participants  
170 were instructed to continue reaching as they were (maintain block) for the following 50 trials.  
171 Following this, participants were then informed that the reward region shifted during the  
172 experiment but not of the magnitude or the direction of the shift. They were then instructed to  
173 return to reaching in the same manner as they were at the start of the experiment (remove  
174 block, 50 trials). During the learning phase of the task participants were given a 1-minute rest  
175 after trials 190 and 340.

176 *Preserve task.* Participants performed 515 trials in total. On each trial participants were  
177 instructed to make a rapid ‘shooting’ movement that passed through a target (white circle,  
178 radius: 0.125cm) visible on the screen. The starting position for each trial was indicated by a  
179 white square (width: 1cm) roughly 30cm in front of the midline and the target was located at  
180 angle of 45° from the perpendicular in a counter clockwise direction at a distance of 8cm. The  
181 position of the tracking device attached to the fingertip was displayed as a cursor (green  
182 circle, radius: 0.125cm). When the radial distance of the cursor from the starting position  
183 exceeded 8cm, the cursor feedback disappeared, and the end position was displayed instead.  
184 First, participants performed a baseline period of 40 trials, during which the position of the  
185 cursor was visible and the cursor accurately reflected the position of the fingertip. In the  
186 adaptation block (75 trials), participants were exposed to an abruptly introduced 20°  
187 clockwise visuomotor rotation of the cursor feedback (Figure 1b). Subsequently, all visual  
188 feedback of the cursor was removed, and participants received only binary feedback. If the  
189 end position of the movement fell within a reward region, the trial was considered successful  
190 and a tick was displayed; otherwise a cross was displayed. The reward region was centred at  
191 a clockwise rotation of 20° with respect to the visual target with a width of 10° i.e. it was  
192 centred on the direction that successfully accounted for the previously experienced  
193 visuomotor rotation. Binary feedback was provided for 200 trials divided into 2 blocks of 100  
194 trials (asymptote blocks). Furthermore, participants experienced 2 “refresher” trials for every  
195 10 trials, where rotated visual feedback of the cursor position was again accessible (Codol et  
196 al., 2018; Shmuelof et al., 2012). This represents an increase compared to Codol et al. (2018)  
197 because participants in this study tended to have poorer performance under binary feedback,  
198 possibly due to a fatigue effect following the WM tasks (Anguera et al., 2012; see discussion).  
199 Finally, two blocks (100 trials each) with no performance feedback were employed in order  
200 to assess retention of the perturbation (no-feedback blocks). Before the first of those two



201 blocks, participants were informed of the visuomotor rotation, asked to stop accounting for it  
 202 through aiming off target and to aim straight at the target.  
 203

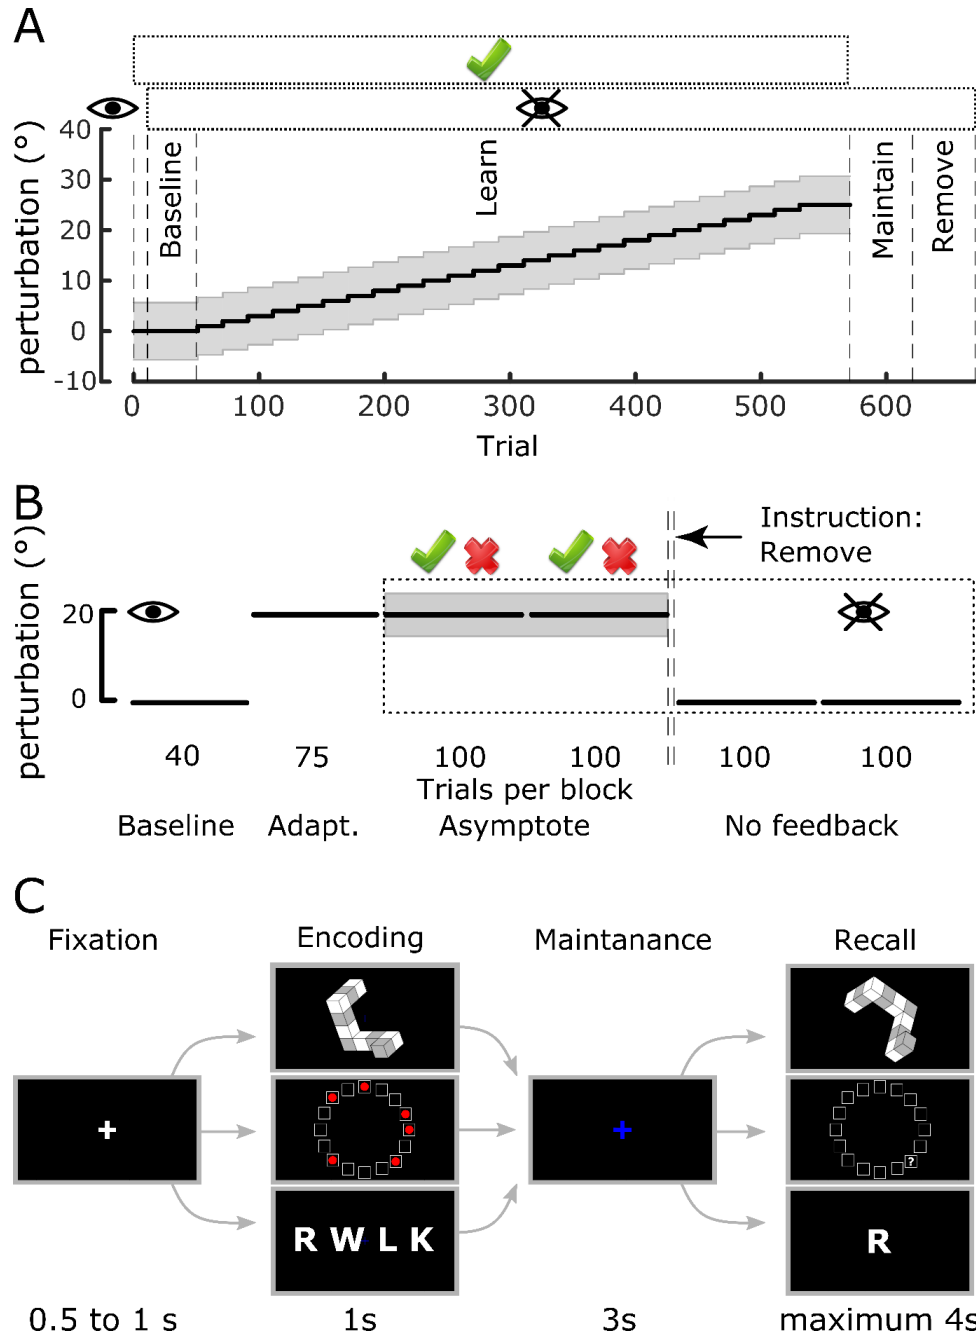

204  
 205 **Figure 1. Experimental design. A: Time course of the Acquire task with the**  
 206 **different experimental periods labelled. The grey region represents the reward region,**  
 207 **which gradually rotated away from the visual target after the initial baseline period.**  
 208 **The rectangle enclosing the green tick above the axes represents trials in which reward**

209 was available, and the rectangle with the ‘eye’ symbol indicates when vision was not  
210 available. **B: Time course of the Preserve task. After adapting to an initial rotation with**  
211 **vision available, vision was removed (eye symbol) and reward-based feedback was**  
212 **introduced (tick and cross above the axes). Prior to the no-feedback blocks participants**  
213 **were instructed to remove any strategy they had been using. C: WM capacity tasks, the**  
214 **three tasks followed a stereotyped timeline with only the items to be remembered**  
215 **differing. Each trial consisted of 4 phases (Fixation, Encoding, Maintenance, and**  
216 **Recall) with the time allocated to each displayed below.**

217

### 218 **Working memory tasks**

219 Participants performed three WM tasks, all of which followed the same design with the  
220 exception of the nature of the items to be remembered (Figure 1c). All WM tasks were run  
221 using Matlab (The Mathworks, Natwick, MA) and Psychophysics toolbox (Brainard, 1997).  
222 At the start of each trial, a white fixation cross was displayed in the centre of the screen for a  
223 period of 0.5 to 1s randomly generated from a uniform distribution (fixation period Figure  
224 1c). In the encoding period, the stimuli to be remembered was displayed for 1s and then  
225 subsequently replaced with a blue fixation cross for the maintenance period which persisted  
226 for 3s. Finally, during the recall period, participants were given a maximum of 4s to respond  
227 by pressing one of three keys on a keyboard with their dominant hand. The ‘1’ key indicated  
228 that the stimuli presented in the recall period was a ‘match’ to that presented in the encoding  
229 period, the ‘2’ key indicated a ‘non-match’ and pressing ‘3’ indicated that the participant was  
230 unsure as to the correct answer. Each WM task contained 5 levels of difficulty with the 12  
231 trials presented for each; 6 of which were trials in which ‘match’ was the correct answer and  
232 6 in which ‘non-match’ was the correct answer. Consequently, each task consisted of 60 trials  
233 and the order in which the tasks were performed was pseudorandomised across participants.

234 Prior to the start of each task participants performed 10 practice trials to familiarise  
235 themselves with the task and instructions. For both the Acquire and Preserve tasks, the WM  
236 tasks were performed in the same experimental session as the reaching. However, in the case  
237 of the Acquire task the WM tasks were performed after the reaching task whereas for the  
238 Preserve task the WM tasks were performed first.

239 In the rotation WM task (RWM, Figure 1c top row), the stimuli consisted of six 2D  
240 representations of 3D shapes drawn from an electronic library of the Shepard and Metzler  
241 type stimuli (Peters and Battista, 2008). The shape presented in the recall period was always  
242 the same 3D shape presented in the encoding period after undergoing a screen-plane rotation  
243 of 60°, 120°, 180°, 240° or 300°. In ‘match’ trials, the only transform applied was the  
244 rotation; however, in ‘non-match’ trials an additional vertical-axis mirroring was also applied.  
245 The difficulty of mental rotation has been demonstrated to increase with larger angles of  
246 rotation (Shepard and Metzler, 1971) and therefore the different degrees of rotation  
247 corresponded to the 5 levels of difficulty. However, given the symmetry of two pairs of  
248 rotations (60 and 300, 120 and 240), these 5 levels were collapsed to 3 for analysis.

249 In the spatial WM task (SWM, Figure 1c middle row), stimuli in the encoding period  
250 consisted of a variable number of red circles placed within 16 squares arranged in a circular  
251 array (McNab and Klingberg, 2008). In the recall period, the array of squares was presented  
252 without the red circles and instead a question mark appeared in one of the squares.  
253 Participants then answered to the question “*Was there a red dot in the square marked by a*  
254 *question mark?*” by pressing a corresponding key. In ‘match’ trials the question mark  
255 appeared in one of the squares previously containing a red circle and in ‘non-match’ trials it  
256 appeared in a square that was previously empty. Difficulty was scaled by varying the number  
257 of red circles (i.e. the number of locations to remember) from 3 to 7.

258 In the verbal WM task (VWM, Figure 1c bottom row), participants were presented with a list  
259 of a variable number of consonants during the encoding period. In the recall period a single  
260 consonant was presented, and participants answered to the question “*Was this letter included*  
261 *in the previous array?*”. Thus, the letter could either be drawn from the previous list (‘match’  
262 trials) or have been absent from the previous list (‘non-match’ trials). Difficulty in this task  
263 was determined by the length of the list to be remembered, ranging from 5 to 9.

#### 264 **Genetic sample collection and profiling**

265 COMT is thought to affect DA function mainly in the prefrontal cortex (Egan et al., 2001;  
266 Goldberg et al., 2003), a region known for its involvement in WM and strategic planning  
267 (Anguera et al., 2010; Doll et al., 2015), whereas DARPP32 and DRD2 act mainly in the  
268 basal ganglia to promote exploitative behaviour, possibly by promoting selection of the  
269 action to be performed (Frank et al., 2009). Consequently, we focused here on SNPs related  
270 to those genes: RS4680 (COMT) and RS907094 (DARPP32). Regarding DRD2, there are  
271 two potential SNPs available, RS6277 and RS1800497. Although previous studies focusing  
272 on exploration and exploitation have assessed RS6277 expression (Doll et al., 2016; Frank et  
273 al., 2007, 2009), it should be noted that this SNP varies greatly across ethnic groups, with  
274 some allelic variations being nearly completely absent in non-Caucasian-European groups  
275 (e.g. see RS6277 in 1000 Genomes Project (The 1000 Genomes Project Consortium et al.,  
276 2015)). This has likely been inconsequential in previous work, as Caucasian-European  
277 individual represented the majority of sampled groups; here however, this represents a critical  
278 shortcoming, as we aim at investigating a larger and more representative population including  
279 other ethnic groups. Consequently, we based our analysis on the RS1800497 allele of the  
280 DRD2 gene (Pearson-Fuhrhop et al., 2013).

281 At the end of the task, participants were asked to produce a saliva sample which was  
282 collected, stabilized and transported using Oragene.DNA saliva collection kits (OG-500,

283 DNAgenotek, Ontario, Canada). Participants were requested not to eat or drink anything  
284 except water for at least two hours before sample collection. Once data collection was  
285 completed across all participants, the saliva samples were sent to LGC (Hoddeson,  
286 Hertfordshire; <https://www.lgcgroup.com/>) for DNA extraction (per Oragene protocols:  
287 <https://www.dnagenotek.com/>) and genotyping. SNP genotyping was performed using the  
288 KASP SNP genotyping system. KASP is a competitive allele-specific PCR incorporating a  
289 FRET quencher cassette. Specifically, the SNP-specific KASP assay mix (containing two  
290 different, allele specific, competing forward primers) and the universal KASP master mix  
291 (containing FRET cassette plus Taq polymerase in an optimised buffer solution) were added  
292 to DNA samples and a thermal cycling reaction performed, followed by an end-point  
293 fluorescent read according to the manufacturer's protocol. All assays were tested on in-house  
294 validation DNA prior to being run on project samples. No-template controls were used, and  
295 5% of the samples had duplicates included on each plate to enable the detection of  
296 contamination or non-specific amplification. All assays had over 90% call rates. Following  
297 completion of the PCR, all genotyping reaction plates were read on a BMG PHERAStar plate  
298 reader. The plates were recycled until a laboratory operator was satisfied that the PCR  
299 reaction had reached its endpoint. In-house Kraken software then automatically called the  
300 genotypes for each sample, with these results being confirmed independently by two  
301 laboratory operators. Furthermore, the duplicate saliva samples collected from 5% of  
302 participants were checked for consistency with the primary sample. No discrepancies  
303 between primary samples and duplicates were discovered.

#### 304 **Data Analysis**

305 *Acquire task:* Reach trials containing MTs over 0.6s or less than 0.2s were removed from  
306 analysis (6.9%). The end point angle of each movement was defined at the time when the  
307 radial distance of the cursor exceeded 10cm. This angle was defined in relation to the visible

308 target with positive angles indicating clockwise rotations, end point angles and target angles  
309 for participants who experienced the counter clockwise rotations were sign-transformed. The  
310 explicit component of retention was defined as the difference between the mean reach angle  
311 of the maintain block and the remove block, while the implicit component was the difference  
312 between the mean reach angle of the remove block and baseline. If during the final 20 trials  
313 before the maintain block a participant achieved a mean reach angle within the reward region,  
314 participants were considered “*successful*” in learning the rotation; they were considered  
315 “*unsuccessful*” otherwise. For regression analysis a binary variable “*task success*” was  
316 defined as 1 and 0 for successful and unsuccessful participants, respectively. As in Holland et  
317 al (2018), for unsuccessful participants, the largest angle of rotation at which the mean reach  
318 angle fell within the reward region was taken as the end of successful performance, and only  
319 trials prior to this point were included for further analysis. Success rate was defined as the  
320 percentage of trials during the learning blocks in which the end point angle was within the  
321 reward region. In order to examine the effect of reward on the change in end point angle on  
322 the subsequent trial, we calculated the absolute change in end point angle between  
323 consecutive trials (Holland et al., 2018; Sidarta et al., 2018; Therrien et al., 2016, 2018).  
324 Subsequently we calculated the median absolute change in angle following rewarded trials  
325 ( $\Delta R$ ) and the median absolute deviation of these values (MAD [ $\Delta R$ ]). This analysis was  
326 repeated for the changes in angle following unsuccessful trials ( $\Delta P$  and MAD [ $\Delta P$ ]).  
327 *Preserve task:* Reach trials containing MTs over 1s were removed from analysis (2.38% of  
328 all trials). The end point angle for each movement was defined at the time that the radial  
329 distance of the cursor from the start position exceeded 8cm. Trials in which the error was  
330 greater than  $80^\circ$  were excluded from further analysis (0.94% of trials). For each participant  
331 we plotted the reach error in one trial against the change in reach angle in the following trial  
332 for all trials in the adaptation block. The angle of the line of best fit was then used as the

333 learning rate (Hutter and Taylor, 2018). Using this approach, a perfect adaptation leads to a  
334 value of -1, indicating that the error on a given trial is fully accounted for on the next trial.  
335 Overall this approach fitted the data well (mean  $R^2=0.5038$ ,  $SD=0.12$ ). As in Codol et al  
336 (2018), success rate, corresponding to percentage of rewarded trials, was measured separately  
337 in the first 30 and last 170 trials of the asymptote blocks and labelled early and late success  
338 rate, respectively. This reflects a dichotomy between a dominantly exploration-driven early  
339 phase and a later exploitation-driven phase. Implicit retention was defined as the difference  
340 between the average baseline reach direction and the mean reach direction of the last 20 trials  
341 of the last no-feedback block (Codol et al., 2018). Analysis of changes in reach angle  
342 following rewarded trials were not pre-registered, but were included post-hoc.

343 *Exploratory analysis of reaching data:* In order to understand which outcome variables in the  
344 reaching tasks were predictive of overall task success, we split the learning period into two  
345 sections for every participant. We assessed trial-by-trial changes in end point angle in the first  
346 section, and compared them to success rate in the second section. For the Acquire task, we  
347 assessed trial-by-trial adjustments during the learning block, excluding the final 20 trials, and  
348 compared them to success rate in the last 20 trials of the learning block. In the Preserve task,  
349 we measured adjustments in the first 100 trials of the asymptote blocks and compared them to  
350 success rate in the last 100 trials of the asymptote blocks.

351 *WM tasks:* WM performance was defined as the average percentage of correct responses  
352 across the 3 highest levels of difficulty for each task. In the case of the RWM task, the  
353 symmetrical arrangement of the angles of rotation in effect produced three levels of difficulty  
354 and therefore all trials were analysed.

355 *Genetics:* Genes were linearly encoded, with heterozygote alleles being 0, homozygote  
356 alleles bearing the highest dopaminergic state being 1, and homozygote alleles bearing the  
357 lowest dopaminergic state being -1 (Table 1). All groups were assessed for violations of the

358 Hardy-Weinberg equilibrium. The participant pool in the Preserve task was in Hardy-  
359 Weinberg equilibrium for all three genes considered, even when restricted to the Caucasian-  
360 only subpopulation. In the Acquire task population, COMT and DRD2 were in Hardy-  
361 Weinberg equilibrium, but DARPP32 was not ( $p=0.002$ ), with too few heterozygotes.  
362 Therefore, the DARPP32 alleles were recoded, with the heterozygotes (0) and the smallest  
363 homozygote group (C:C, -1) combined and recoded as 0. In the analysis including only the  
364 Caucasian subset, all three alleles were in the Hardy-Weinberg equilibrium, although  
365 combining the heterozygote and smallest homozygote group did not change the results.

366

367

**Table 1. Coding for SNPs**

| SNP       | location | Allele code -1 | Allele code 0 | Allele code 1 |
|-----------|----------|----------------|---------------|---------------|
| rs4680    | COMT     | G:G (val:val)  | A:G (met:val) | A:A (met:met) |
| rs1800497 | DRD2     | T:T (lys:lys)  | T:C (lys:glu) | C:C (glu:glu) |
| rs907094  | DARPP32  | C:C            | C:T           | T:T           |

368

369 *Statistical Analysis:* Regressions were performed using stepwise linear regressions  
370 (*stepwiselm* function in MatLab's *Statistics and Machine Learning Toolbox*), so as to select  
371 the most parsimonious model. A stepwise logistic regression was employed for overall task  
372 success in the Acquire task. Prior to the regression analysis, all predictors and predicted  
373 variables were standardised (z-scored), with the exception of the values encoding the genetic  
374 alleles. For all non-ordinal variables individual data were considered outliers if further than 3  
375 standard deviations from the mean and were removed. Multicollinearity of predictors was  
376 also assessed before regression with Belsley Collinearity Diagnostics (*collintest* function in  
377 MatLabs's *Econometrics Toolbox*) and no predictors were found to exhibit condition indexes



378 over 30, indicating acceptable levels of collinearity. When considering retention for both  
379 tasks, unsuccessful participants were removed from the regression analysis.

## 380 **Results**

### 381 **Acquire task**

382 In the Acquire task, participants had to learn to compensate for a slow and undisclosed of the  
383 reward region in order to obtain successful feedback (Figure 2, 3). As in Holland et al. (2018),  
384 about a quarter (28.1%) of participants failed to learn to compensate for the full extent of the  
385 rotation (Figure 3a). Successful participants retained most of the learnt rotation (mean 80.7%  
386  $\pm$  28.0% SD) in the maintain block. However, upon being asked to remove any strategy they  
387 had been employing, their performance returned to near-baseline levels. Consequently, a  
388 large explicit component to retention was found for successful participants (Figure 3b),  
389 whereas both successful and unsuccessful participants manifest a small but non-zero implicit  
390 component ( $t(86)=9.90$ ,  $p=7.43\times 10^{-16}$  and  $t(33)=4.53$ ,  $p=7.39\times 10^{-5}$ , respectively; Figure 3c).  
391 Furthermore, in accordance with Holland et al (2018) we found that participants made larger  
392 ( $t(120)=15.80$ ,  $p=4.32\times 10^{-31}$ ) and more variable changes in reach angle following unrewarded  
393 trials ( $t(120)=13.36$ ,  $p=1.68\times 10^{-25}$ ; Figure 3d-h), whereas in participants who would go on to  
394 fail, the post-error adjustments were smaller than in successful participants ( $t(119)=3.33$ ,  
395  $p=0.001$ ; Figure 3d). Changes following rewarded trials were similar between the groups  
396 ( $t(119)=0.71$ ,  $p=0.48$ ; Figure 3f, g). The results obtained in this sample ( $N=121$ ) therefore  
397 replicate results from a previous study ( $N=30$ ) and provides further confirmation that  
398 performance in this task is fundamentally explicitly driven (Holland et al., 2018).

399

400

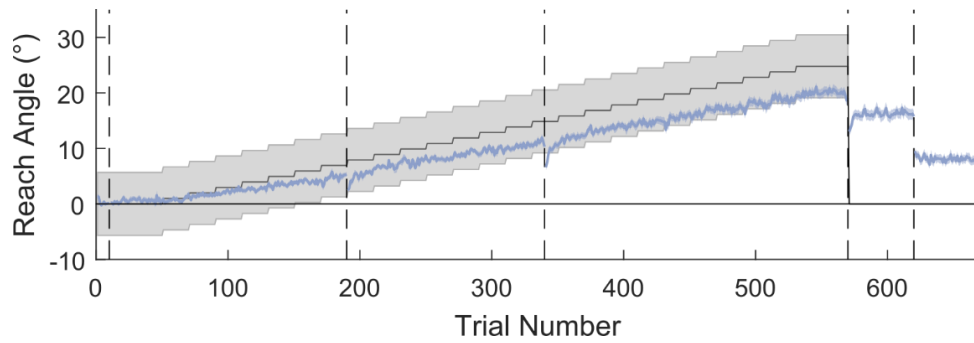

401

402

403

404

405

406

407

408

**Figure 2. Reaching performance in the Acquire task for all subjects. The grey region represents the gradually rotating rewarded region, the blue line represents mean reach angle for each trial, and the shaded blue region represent SEM. Vertical dashed lines represent different experiment blocks or breaks. Average performance for the full cohort falls within the reward region and demonstrates a clear reduction in reach angle when asked to remove strategy. N=121.**

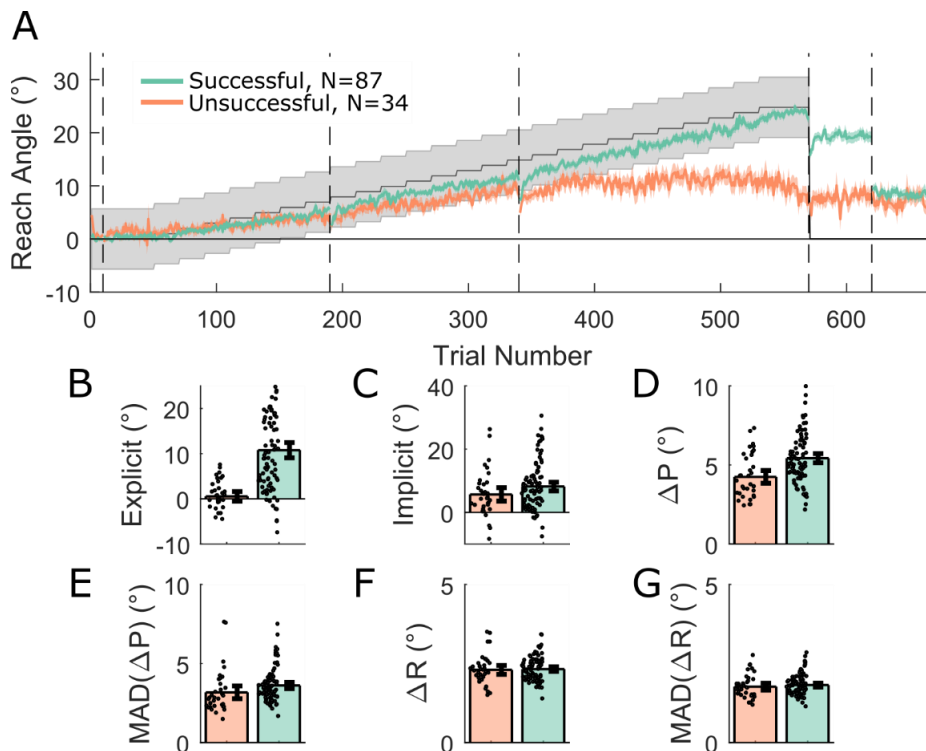

409

410

411

412

**Figure 3. Acquire task split by success at final angle. A: Average reach angle for the successful (green) and unsuccessful (orange) groups, shaded regions represent SEM and grey shaded region represents the rewarded region. Despite similar initial**

413 **performance a clear divergence can be seen between the two groups and an explicit**  
414 **component to retention is only visible in the successful group, whereas implicit retention**  
415 **is similar. B-G: subplots displaying derived measures separated into successful and**  
416 **unsuccessful participants overlaid with individual data points. Error bars represent**  
417 **95% confidence intervals. Although the changes in reach after rewarded trials ( $\Delta R$ ) are**  
418 **similar, the successful group display greater changes after unrewarded trials ( $\Delta P$ ).**

419

420 In order to understand what genetic and WM factors are predictive of performance in the  
421 reaching task we performed a stepwise regression of the seven predictors (three allelic  
422 variations, three WM and ethnicity) onto each of several outcome measures representative of  
423 performance: success rate, implicit and explicit retention,  $\Delta R$ ,  $MAD[\Delta R]$ ,  $\Delta P$ ,  $MAD[\Delta P]$ .  
424 Additionally, we performed a stepwise logistic regression of the predictors onto a binary  
425 variable encoding if a participant successfully learnt the full rotation (1) or not (0). The  
426 logistic regression showed no significant predictors of task success, that is, of being able to  
427 follow the shifting reward region until the end of the learning block. However, higher SWM  
428 was predictive of an increased success rate (percentage of correct trials;  $\beta=0.416$ ,  $p=2.45 \times 10^{-6}$ ).  
429 <sup>6</sup>). To ensure that the relationship between SWM and success rate was not due to failure at a  
430 later point in the task, success rate was measured during the initial period in which subjects  
431 who could not fully account for the displacement are still successful; for those who could, the  
432 full learning block was included. Next, retention was assessed by splitting up the explicit and  
433 implicit components such as in Holland et al. (2018). No predictor could explain the implicit  
434 component, but the explicit component was strongly and positively predicted by RWM  
435 ( $\beta=0.373$ ,  $p=1.78 \times 10^{-4}$ ). These results suggest positive effects of both RWM and SWM on  
436 task performance: greater RWM predicts a greater contribution of explicit processes to  
437 learning, whereas greater SWM predicts a greater percentage of correct trials.

438 **Table 2: Regressions with significant models for the Acquire task. regression. SR:**  
 439 **success rate.**

440

| <b>Ethnicity</b>  | <b>Outcome</b>    | <b>Predictor</b>  | <b>Betas</b> | <b>SE</b> | <b>p</b>              | <b>Model</b>                              |                           |
|-------------------|-------------------|-------------------|--------------|-----------|-----------------------|-------------------------------------------|---------------------------|
| All               | SR                | SWM               | 0.416        | 0.084     | $2.45 \times 10^{-6}$ | F(117,2)=2.475, p= 0.036                  |                           |
|                   | Explicit          | RWM               | 0.373        | 0.095     | $1.78 \times 10^{-4}$ | F(117,2)=15.370, p= $1.78 \times 10^{-4}$ |                           |
|                   | $\Delta P$        | VWM               | -0.243       | 0.089     | 0.007                 | F(117,2)=7.46,<br>p=0.007                 |                           |
|                   | MAD( $\Delta P$ ) | RWM               | -0.230       | 0.089     | 0.011                 | F(117,2)=6.667,<br>p=0.011                |                           |
|                   | $\Delta R$        | SWM               | -0.251       | 0.089     | 0.005                 | F(117,2)=8.028, p=0.005                   |                           |
|                   | MAD( $\Delta R$ ) | SWM               | -0.283       | 0.088     | 0.002                 | F(117,2)=10.355, p=0.002                  |                           |
|                   | SR                | SWM               | 0.293        | 0.104     | 0.006                 | F(80,2)=7.822, p=0.006                    |                           |
|                   | Caucasian         | Explicit          | RWM          | 0.300     | 0.105                 | 0.002                                     | F(80,2)=8.207, p=0.002    |
|                   |                   | $\Delta P$        | VWM          | -0.219    | 0.107                 | 0.043                                     | F(80,2)=4.211,<br>p=0.043 |
|                   |                   | MAD( $\Delta P$ ) | RWM          | -0.283    | 0.110                 | 0.012                                     | F(80,2)=6.618,<br>p=0.012 |
| $\Delta R$        |                   | SWM               | -0.280       | 0.109     | 0.013                 | F(80,2)=6.538, p=0.013                    |                           |
| MAD( $\Delta R$ ) |                   | SWM               | -0.282       | 0.111     | 0.013                 | F(80,2)=6.432, p =0.013                   |                           |

441

442

443

444 In Holland et al (2018), the amplitude of the changes in reach angle participants made  
 445 following unrewarded trials was found to be predictive of task success, that is,  $\Delta P$  was

446 predictive of overall task success. Thus, it could be that RWM and SWM, that are shown to  
447 predict performance in this study, are themselves predictors of changes in reach angle. The  
448 regression results demonstrated that large  $\Delta R$  was inversely predicted by SWM ( $\beta=-0.251$ ,  
449  $p=0.005$ ), as was  $MAD[\Delta R]$  ( $\beta=-0.283$ ,  $p=0.002$ ). The results indicate that greater SWM was  
450 predictive of smaller and less variable changes in reach angle after successful trials,  
451 suggesting high SWM enables the maintenance of rewarding reach angles. It was also found  
452 that the size of changes in reach angle after unrewarded trials ( $\Delta P$ ) was inversely predicted by  
453 VWM ( $\beta=-0.243$ ,  $p=0.007$ ) and the variability of these changes was negatively predicted by  
454 RWM ( $\beta=-0.230$ ,  $p=0.011$ ). This result was unexpected as it suggests that greater WM  
455 capacity predicts smaller changes following unrewarded trials, whereas previous results  
456 suggest a positive relationship between these changes and overall task success. Finally, to  
457 ensure the robustness of the results, we tested whether retaining only the largest ethnic group  
458 in our population (i.e. Caucasian,  $N=82/121$ ) produced the same results as was observed with  
459 the full participant pool. In accordance with the full sample, all previously described  
460 relationships were also found in the Caucasian only subset (Table 2).

461 Overall, WM (in particular RWM and SWM) successfully predicted various aspects of  
462 performance in the Acquire task, while genetic predictors failed to do so. Specifically, greater  
463 SWM predicted smaller and less variable changes after correct trials. This suggests that SWM  
464 underlies one's capacity to preserve and consistently express an acquired reach direction to  
465 obtain reward. Furthermore, SWM also directly predicted success rate. In addition, greater  
466 RWM was a strong predictor of explicit control. The inverse relationships between VWM  
467 and RWM and the magnitude and variability of changes after unrewarded trials was  
468 unexpected. However, one possible explanation is that participants with poorer WM capacity  
469 make larger errors which require larger corrections. Restricting our group to Caucasians  
470 showed that these effects are robust to ethnicity.

471

472 **Preserve task**

473 In this task, we addressed how well participants can maintain a previously learnt adaptation  
474 after transitioning to binary feedback. As participants are unable to compensate for a large  
475 abrupt displacement of a hidden reward region (van der Kooij and Overvliet, 2016; Manley et  
476 al., 2014), participants first adapted to an abruptly introduced 20° clockwise rotation with full  
477 vision of the cursor available. Subsequently, visual feedback of the cursor position was  
478 replaced with binary feedback; participants were rewarded if they continued reaching towards  
479 the same angle that resulted in the cursor hitting the target during the adaptation phase.  
480 Overall, participants adapted to the visuomotor rotation successfully (Figure 4, 5a-c) before  
481 transitioning to the binary feedback-based asymptote blocks. However, from the start of the  
482 asymptote blocks onward, participants exhibited very poor performance, expressing an  
483 average  $45.0 \pm 24.2$  SD% success rate when considering all 200 asymptote trials (Figure 4, 5a,  
484 d, e). Separating successful and unsuccessful participants (40% success rate cut-off; Figure  
485 5a) revealed that successful participants expressed behaviour greatly similar to that observed  
486 in Codol et al. (2018), in which unsuccessful participants were excluded, using the same cut-  
487 off (40% success rate). The ‘spiking’ behaviour observed in reach angles during the  
488 asymptote blocks (Figure 5a) is due to the presence of the ‘refresher’ trials, with the large  
489 positive changes in reach angle corresponding to trials immediately following the refresher  
490 trials. This pattern of behaviour is particularly pronounced in the unsuccessful participants.  
491 Finally, all participants demonstrated at least a residual level of retention even after being  
492 instructed to remove any strategy they had employed (Figure 5a, f). However, as expected,  
493 participants who experienced more success during asymptote blocks also expressed higher  
494 retention overall in the final two blocks (Figure 5a, f).

495

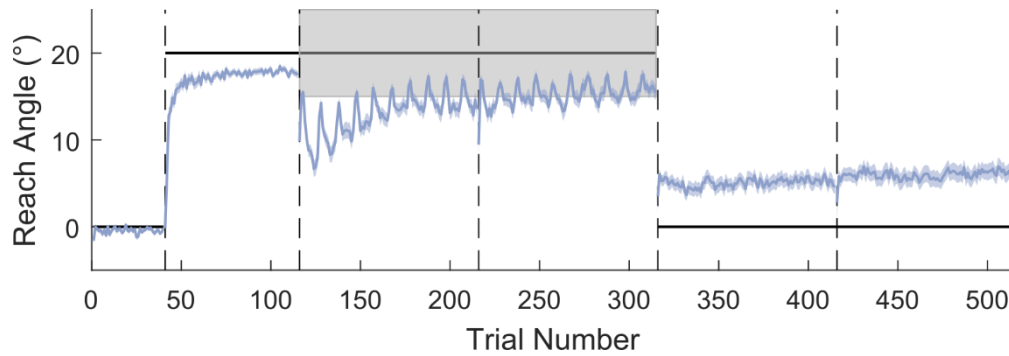

496

497

498

499

500

501

502

503

504

505

**Figure 4. Reaching performance in the Preserve task for all subjects. The grey shaded area represents the rewarded region, and the thick black line represents the perturbation. The vertical dashed lines represent block limits. The blue line indicates mean reach angle for every trial and blue shaded areas represent SEM. After successfully adapting to the visuomotor rotation performance deteriorates at the onset of binary feedback before success rate increases towards the end of the asymptote blocks. Following the removal of all feedback and the instruction to remove any strategy, a small amount of implicit retention remains. N=120.**

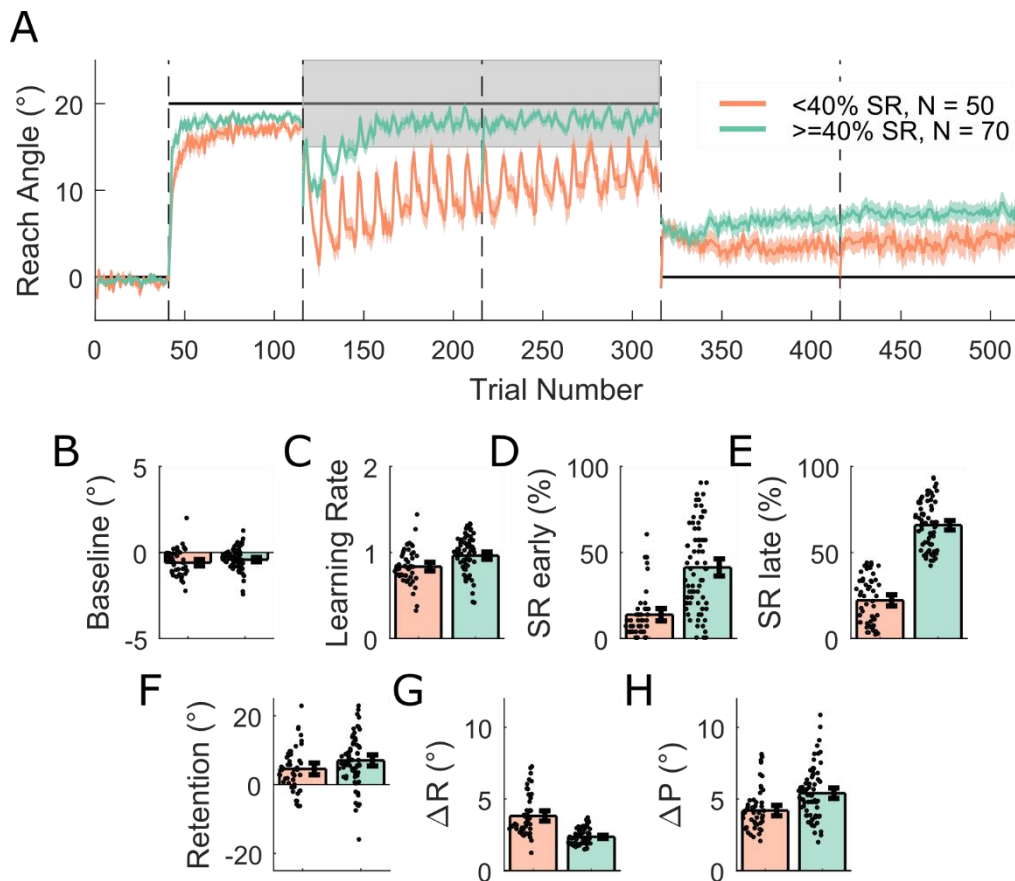

506

507

508

509

510

511

512

513

514

515

516

517

518

519

**Figure 5. Reaching performance in the Preserve task with participants split into two groups on the basis of success rate. A: Shaded regions represent SEM. B-H: Derived variables for the two groups, error bars on the bars represent 95% confidence intervals and individual data points are displayed. SR: success rate.**

As in the Acquire task, we examined if performance in any of the WM tasks or genetic profile could predict participant's behaviour. We performed separate stepwise regressions for the following outcome variables: baseline reach direction as a control variable, learning rate in the adaptation block, early and late success rate in the asymptote blocks (first 30 and last 170 trials; Codol et al., 2018), retention in the no-feedback blocks, and  $\Delta R$  and  $\Delta P$  during the asymptote blocks. The most striking result was that both early and late success rate could be reliably predicted by RWM (early:  $\beta=0.255$ ,  $p=0.005$ ; late:  $\beta=0.287$ ,  $p=0.002$ ; Table 3), with greater RWM predicting increased success rates. Genetic profile did not predict any aspect of



520 performance, analogous to the Acquire task. In contrast, greater SWM successfully predicted  
521 reduced  $\Delta R$  ( $\beta=-0.155$ ,  $p=0.036$ ), similarly to the Acquire task. Finally, retention values were  
522 surprisingly predicted by ethnicity ( $\beta=-0.528$ ,  $p=0.037$ ). Due to the existence of a relationship  
523 between ethnicity and retention, we performed the same analysis as in the Acquire task, that  
524 is, we tested if our observed results hold if only our largest ethnic group (Caucasian,  
525  $N=85/120$ ) was considered. In accordance with the result for the full population, the positive  
526 relationship between late success rate and RWM was again observed ( $\beta=0.232$ ,  $p=0.037$ ).  
527 However, the SWM- $\Delta R$  and RWM-early success rate relationships were no longer observed  
528 in this smaller subset of the population. Interestingly, retention was now predicted by a  
529 genetic variable, DARPP32 ( $\beta=-0.335$ ,  $p=0.041$ ), suggesting that less dopaminergic  
530 metabolism leads to better retention. This last result again suggests a possible confound, that  
531 is, that DARPP32 allelic distribution was different across ethnic groups. However, a  $\chi^2$  test  
532 analysis demonstrated that DARPP32 alleles were evenly distributed between the Caucasian  
533 and non-Caucasian group, ruling out this possibility ( $\chi^2=2.578$ ,  $p=0.276$ ).

534

535

536

537

538

539

540

541

542

543

544

545 **Table 3. Regression with significant models for Preserve task. SR: success rate.**

| <b>Ethnicity</b> | <b>Outcome</b> | <b>Predictor</b> | <b><math>\beta</math></b> | <b>SE</b> | <b>p</b> | <b>Model</b>                 |
|------------------|----------------|------------------|---------------------------|-----------|----------|------------------------------|
| All              | early SR       | RWM              | 0.255                     | 0.089     | 0.005    | F(2,117)=8.207,<br>p=0.005   |
|                  | late SR        | RWM              | 0.287                     | 0.088     | 0.002    | F(2,117)=10.583,<br>p=0.002  |
|                  | Retention      | Ethnicity        | -0.528                    | 0.248     | 0.037    | F(2,117)=4.525, p =<br>0.037 |
|                  | $\Delta R$     | SWM              | -0.155                    | 0.073     | 0.036    | F(2,117)=4.502,<br>p=0.036   |
| Caucasian        | Late SR        | RWM              | 0.233                     | 0.106     | 0.031    | F(2,83)=4.815,<br>p=0.031    |
|                  | Retention      | DARPP32          | -0.335                    | 0.159     | 0.041    | F(2,83)=4.451,<br>p=0.041    |

546

547 Overall the regression results fit a pattern similar to that found for the Acquire task with  
 548 greater RWM and SWM predicting improved performance on the reaching task and greater  
 549 SWM predicting smaller changes in reach angle after rewarded trials. However, in the  
 550 Preserve task we did not observe any predictors of  $\Delta P$ , and only in one specific instance did  
 551 we observe any genetic predictors of performance.

552

### 553 **Exploratory analysis**

554 As a relationship exists between SWM and  $\Delta R$  in both the Acquire and Preserve paradigms,  
 555 we ran exploratory regressions to assess the relationship between  $\Delta R$  and success rate across

556 both tasks. Since  $\Delta R$  and success rate are conceptually strongly related variables, and  
557 measuring them on the same data set would render them non-independent, we split each  
558 individual's reaching data into two sections and assessed whether  $\Delta R$  or  $\Delta P$  in the first  
559 section could reliably predict success rate in the second (see methods for details). Although  
560 we found no predictors of  $\Delta P$  in our primary analysis, results here in combination with  
561 previous work (Holland et al., 2018) has demonstrated a link between  $\Delta P$  and task success,  
562 with a greater  $\Delta P$  indicative of greater success. Therefore, we also performed the same  
563 analysis for  $\Delta P$ .

564  
565

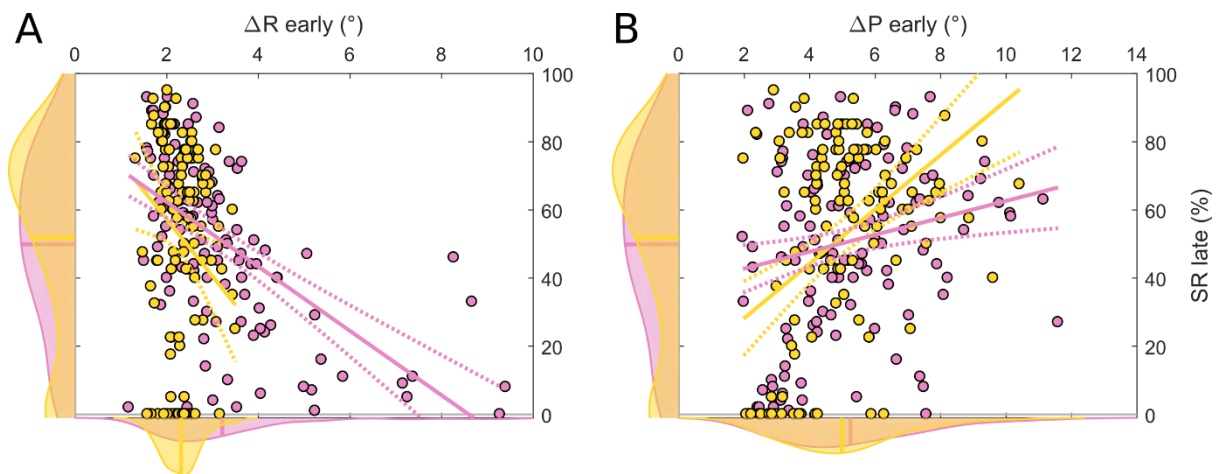

566

567 **Figure 6. Slice plots showing regression results for prediction of late success rate**  
568 **(SR) by changes in reach angle following rewarded (A) and unrewarded (B) trials**  
569 **during the early learning period. The central axis of each panel displays the individual**  
570 **data from the Acquire (yellow) and Preserve (pink) task, the smoothed distribution of**  
571 **the data in each dimension is displayed on the corresponding axis. Solid lines represent**  
572 **the prediction of the regression model when the other predictor is held at its mean value.**

573

574

575

**Table 4: Regression results for split data.**

|          |         | $\Delta R$             | $\Delta P$            | Model                                     |
|----------|---------|------------------------|-----------------------|-------------------------------------------|
| Acquire  | $\beta$ | -0.274                 | 0.581                 | F(115,2)=11.9<br>p=2.09×10 <sup>-5</sup>  |
|          | SE      | 0.111                  | 0.120                 |                                           |
|          | p       | 0.015                  | 3.89×10 <sup>-6</sup> |                                           |
| Preserve | $\beta$ | -0.750                 | 0.229                 | F(112,2)=35.3<br>p=1.28×10 <sup>-12</sup> |
|          | SE      | 0.093                  | 0.084                 |                                           |
|          | p       | 1.07×10 <sup>-12</sup> | 0.007                 |                                           |

576

577

578 In the Acquire task,  $\Delta R$  and  $\Delta P$  in the first section of learning trials predicted success rate in  
579 the final twenty trials, though  $\Delta P$  appeared as the strongest predictor ( $\Delta R$ :  $\beta=-0.274$ ,  $p=0.015$ ;  
580  $\Delta P$ :  $\beta=0.581$ ,  $p=3.89^{-6}$ ; Figure 6a, b, yellow; Table 4). Similarly, for the Preserve task  $\Delta R$  and  
581  $\Delta P$  in the first half of asymptote trials predicted success rate in the second half ( $\Delta R$ :  $\beta=-0.750$ ,  
582  $p=1.07^{-12}$ ;  $\Delta P$ :  $\beta=0.229$ ,  $p=0.007$ ; Figure 6a, b, pink; Table 4). In both tasks the directions of  
583 these relationships were opposite; greater success rate was predicted by smaller changes  
584 following rewarded trials and greater changes following unrewarded trials. In summary, we  
585 found that for both tasks the magnitude of changes in behaviour in response to rewarded and  
586 unrewarded trials early in learning were strongly predictive of future task success across both  
587 the Acquire and Preserve tasks.

588

## 589 Discussion

590 In this study, we sought to identify if genetic background or specific domains of WM  
591 capacity could explain the variability observed in performance levels during reward-based  
592 motor learning. We found that RWM and SWM both successfully predicted different aspects  
593 of the Acquire and Preserve tasks, while VWM did not consistently relate to any behavioural  
594 measures of performance. Specifically, RWM predicted the explicit component of retention

595 in the Acquire task and success rate at the early and late stage in the Preserve task, whereas  
596 SWM predicted success rate in the Acquire task and  $\Delta R$  in both tasks. Conversely, allelic  
597 variations of the three dopamine-related genes (DRD2, COMT and DARPP32) did not  
598 predict any behavioural variables in the full sample of participants. This suggests that SWM  
599 strongly predicts a participant's capacity to reproduce a successful motor action, while RWM  
600 predicts a participant's ability to express an explicit strategy when required to make large  
601 behavioural adjustments. Therefore, we conclude that WM capacity plays a pivotal in  
602 determining individual ability in reward-based motor learning.

603

604 An interesting dichotomy observed here was the strong reliance on SWM and RWM for the  
605 Acquire and Preserve task, respectively. Although both tasks involved binary feedback, the  
606 Preserve task required the maintenance of an abrupt, large change in behaviour, whereas the  
607 Acquire task required the gradual adjustment of behaviour based on the rewarding outcomes  
608 of recent trials. Therefore, it could be that RWM underscores one's capacity to express a  
609 large correction consistently over trials (i.e. to preserve it) with binary feedback, while SWM  
610 reflects one's capacity to maintain a memory of previously rewarded actions and adjust  
611 behaviour accordingly. Conforming to this, the magnitude of  $\Delta R$ s was strongly and  
612 negatively predicted by SWM but not RWM in both tasks, suggesting high SWM enables the  
613 maintenance of rewarding reach angles. Furthermore, explicit retention, an element of the  
614 Acquire task requiring a large, sudden changes in reach direction, was predicted not by SWM,  
615 but by RWM.

616

617 Surprisingly, although  $\Delta P$  was a very strong predictor of success in both the Acquire and  
618 Preserve tasks, this behavioural measure was not predicted by any genetic variable. In the  
619 Acquire task  $\Delta P$  was inversely predicted by VWM. This is a surprising result given the

620 positive relationship between  $\Delta P$  and success rate found in both tasks, suggesting VWM  
621 would likely be positively related to success rate, which was found for neither task. Whilst no  
622 predictor of  $\Delta P$  was found in the Preserve task,  $\Delta P$  is however likely to be important for  
623 explicit control, as errors are a central element leading to the induction of structural learning  
624 in reward-based tasks, reinforcement learning (Daw et al., 2011; Manley et al., 2014; Sutton  
625 and Barto, 1998) and motor learning in general (Maxwell et al., 2001; Sidarta et al., 2018).

626

627 If RWM is important for explicit control and the main element predicting success in the  
628 Preserve task, this raises the question as to whether a gradual design (as in the Acquire task)  
629 is more suitable to engage implicit reinforcement learning, at least in the very early stage.  
630 However, the Acquire task still bears a strong explicit component (Holland et al., 2018). So  
631 how can those two views be reconciled? In reward-based motor learning tasks, it is generally  
632 agreed that participants begin to reflect upon task structure and develop a strategy when they  
633 encounter negative outcomes (Leow et al., 2016; Loonis et al., 2017; Manley et al., 2014;  
634 Maxwell et al., 2001), which happens in the Preserve task nearly immediately once binary  
635 feedback is introduced, due to a lack of generalisation of cerebellar memory (Codol et al.,  
636 2018). On the other hand, in the Acquire task, participants first experience an early learning  
637 phase with mainly rewarding outcomes, thus possibly preventing development of explicit  
638 control and allowing for this early window of reward-based implicit learning. Other studies  
639 have demonstrated that minor adjustments in reach direction under reward-based feedback  
640 can occur, though none has assessed their explicitness directly in the very early stages, such  
641 as about  $1^\circ$  to  $4^\circ$  (Izawa and Shadmehr, 2011; Pekny et al., 2015; Therrien et al., 2016). Of  
642 note however, Izawa and Shadmehr, (2011) observed that after  $8^\circ$  shifts of a similarly-sized  
643 reward region, participants indeed noticed the shift occurrence, but this was not assessed for  
644 smaller shifts.

645 In a previous study (Holland et al., 2018), we asked participants to perform the Acquire task  
646 while performing a secondary task similar to the RWM employed here. We showed that the  
647 secondary task was very effective in preventing explicit control, leading to participants  
648 invariably failing at the reaching task itself. It may therefore appear as surprising that here,  
649 RWM does not relate strongly with success rate in the Acquire task. A possible explanation is  
650 that RWM and SWM share the same memory buffer (Anguera et al., 2010; Beschin et al.,  
651 2005; Cohen et al., 1996; Jordan et al., 2001; Suchan et al., 2006), thus allowing interference.  
652 Similarly, another study employing force-field adaptation showed that the early component of  
653 adaptation – which is considered as bearing a strong explicit element – is selectively  
654 disrupted if a VWM is employed (Keisler and Shadmehr, 2010). In that latter study, the  
655 author argued that the memory buffers for VWM and SWM tasks do not overlap (Babcock  
656 and Vallesi, 2015; Jordan et al., 2001), and thus that the disrupting effect of VWM may be  
657 due to the explicit component also bearing a verbal representation (Buszard and Masters,  
658 2018). However, we found no evidence of this in our reward-based motor tasks. It may be  
659 possible that reward-based motor performance relies more exclusively on spatial instances of  
660 WM as opposed to some other tasks such as force-field adaptation.

661

662 A notable feature of the Preserve task is the “spiking” behaviour observed at the group level,  
663 immediately following “refresher” trials. This phenomenon suggests a central role of  
664 ‘refresher’ trials in binary feedback-based performance when included (Codol et al., 2018;  
665 Shmuelof et al., 2012). Nevertheless, the transient nature of this decrease in error showed that  
666 this was not sufficient to promote generalisation to binary feedback trials, at least in the case  
667 of unsuccessful participants. However, it remains an open question whether the good  
668 performance of successful participants was partly due to a capacity to generalise information  
669 from refresher trials.

670

671 The absence of DA-related genetics effects on behaviour is a surprising result as a substantial  
672 body of literature points to a relationship between dopamine and performance in reward-  
673 based tasks, including those with a motor component (Deserno et al., 2015; Doll et al., 2016;  
674 Frank et al., 2007, 2009; Gershman and Schoenbaum, 2017; Izawa and Shadmehr, 2011;  
675 Nakahara and Hikosaka, 2012; Pekny et al., 2015; Therrien et al., 2016). There is a growing  
676 appreciation of the links between decision making and motor learning (Chen et al., 2018;  
677 Haith and Krakauer, 2013). Chen et al., (2017) demonstrated that exploratory motor learning  
678 can be modelled as a sequential decision-making process, with an individual's explorative  
679 drive shared between motor and decision-making tasks. However, the results presented here  
680 suggest that genetic predictors of exploration and exploitation found in decision-making tasks  
681 are not also predictive of the same behaviours in reward-based motor learning.

682

683 One possibility is that our dataset did not provide enough statistical power. However, our  
684 sample sizes were defined *a priori* for 90% power based on previous work (Doll et al., 2016;  
685 Frank et al., 2009; see pre-registrations), and therefore our study is unlikely to be  
686 underpowered. Another possibility is that we employed the wrong variables to assess  
687 behaviour. However, given the informative and coherent relationships between WM and  
688 motor learning and the ability to predict overall performance on that basis, could it be that the  
689 genes we focused on do not relate in any meaningful way to performance in these reward-  
690 based tasks? In line with this, a recent study showed that DA pharmacological manipulation  
691 did not alter reward effects in a visuomotor adaptation task (Quattrocchi et al., 2018).  
692 However, previous work has shown that Parkinson's disease patients show heavily impaired  
693 reward-based motor performance (Pekny et al., 2015). It is possible that genetic variations  
694 may not impact reward-based motor learning significantly, especially compared to the wide



695 depletion of dopaminergic neurons occurring in Parkinson's disease. Finally, future work  
696 should also address the possibility that other neuromodulators could also be involved during  
697 reward-based motor learning such as acetylcholine, norepinephrine and serotonin (for a  
698 review, see Dash et al., 2007).

699

700 In summary, despite employing two distinct tasks and an independent participant pool on  
701 different devices, we find strikingly similar results in reward-based motor learning. While  
702 SWM strongly predicted a participant's capacity to reproduce a successful motor action,  
703 RWM predicted a participant's ability to express an explicit strategy when required to make  
704 large behavioural adjustments. Therefore, both SWM and RWM are reliable predictors of  
705 success during reward-based motor learning. Surprisingly, no dopamine-related genotypes  
706 predicted performance. Therefore, WM capacity plays a pivotal in determining individual  
707 ability in reward-based motor learning. This could have important implications when using  
708 reward-based feedback in applied settings as it indicates only a subset of the population may  
709 benefit.

710

## 711 **References**

- 712 Anguera, J.A., Reuter-Lorenz, P.A., Willingham, D.T., and Seidler, R.D. (2010).  
713 Contributions of spatial working memory to visuomotor learning. *Journal of Cognitive*  
714 *Neuroscience* 22, 1917–1930.
- 715 Anguera, J.A., Bernard, J.A., Jaeggi, S.M., Buschkuhl, M., Benson, B.L., Jennett, S.,  
716 Humfleet, J., Reuter-Lorenz, P.A., Jonides, J., and Seidler, R.D. (2012). The effects of  
717 working memory resource depletion and training on sensorimotor adaptation. *Behavioural*  
718 *Brain Research* 228, 107–115.

- 719 Babcock, L., and Vallesi, A. (2015). The interaction of process and domain in prefrontal  
720 cortex during inductive reasoning. *Neuropsychologia* *67*, 91–99.
- 721 Beschin, N., Denis, M., Logie, R.H., and Della Sala, S. (2005). Dissociating mental  
722 transformations and visuo-spatial storage in working memory: Evidence from  
723 representational neglect. *Memory* *13*, 430–434.
- 724 Bond, K.M., and Taylor, J.A. (2015). Flexible explicit but rigid implicit learning in a  
725 visuomotor adaptation task. *Journal of Neurophysiology* *113*, 3836–3849.
- 726 Brainard, D.H. (1997). The Psychophysics Toolbox. *Spat Vis* *10*, 433–436.
- 727 Buszard, T., and Masters, R.S.W. (2018). Adapting, correcting and sequencing movements:  
728 does working-memory capacity play a role? *International Review of Sport and Exercise*  
729 *Psychology* *11*, 258–278.
- 730 Chen, X., Mohr, K., and Galea, J.M. (2017). Predicting explorative motor learning using  
731 decision-making and motor noise. *PLOS Computational Biology* *13*, e1005503.
- 732 Chen, X., Holland, P., and Galea, J.M. (2018). The effects of reward and punishment on  
733 motor skill learning. *Current Opinion in Behavioral Sciences* *20*, 83–88.
- 734 Christou, A.I., Miall, R.C., McNab, F., and Galea, J.M. (2016). Individual differences in  
735 explicit and implicit visuomotor learning and working memory capacity. *Scientific Reports* *6*.
- 736 Codol, O., Holland, P.J., and Galea, J.M. (2018). The relationship between reinforcement and  
737 explicit control during visuomotor adaptation. *Scientific Reports* *8*.
- 738 Cohen, M.S., Kosslyn, S.M., Breiter, H.C., DiGirolamo, G.J., Thompson, W.L., Anderson,  
739 A.K., Bookheimer, S.Y., Rosen, B.R., and Belliveau, J.W. (1996). Changes in cortical  
740 activity during mental rotation A mapping study using functional MRI. *Brain* *119*, 89–100.

- 741 Dash, P.K., Moore, A.N., Kobori, N., and Runyan, J.D. (2007). Molecular activity underlying  
742 working memory. *Learning & Memory* *14*, 554–563.
- 743 Daw, N.D., Niv, Y., and Dayan, P. (2005). Uncertainty-based competition between prefrontal  
744 and dorsolateral striatal systems for behavioral control. *Nat. Neurosci.* *8*, 1704–1711.
- 745 Daw, N.D., Gershman, S.J., Seymour, B., Dayan, P., and Dolan, R.J. (2011). Model-Based  
746 Influences on Humans’ Choices and Striatal Prediction Errors. *Neuron* *69*, 1204–1215.
- 747 Deserno, L., Huys, Q.J.M., Boehme, R., Buchert, R., Heinze, H.-J., Grace, A.A., Dolan, R.J.,  
748 Heinz, A., and Schlagenhauf, F. (2015). Ventral striatal dopamine reflects behavioral and  
749 neural signatures of model-based control during sequential decision making. *Proceedings of*  
750 *the National Academy of Sciences* *112*, 1595–1600.
- 751 Doll, B.B., Duncan, K.D., Simon, D.A., Shohamy, D., and Daw, N.D. (2015). Model-based  
752 choices involve prospective neural activity. *Nature Neuroscience* *18*, 767–772.
- 753 Doll, B.B., Bath, K.G., Daw, N.D., and Frank, M.J. (2016). Variability in Dopamine Genes  
754 Dissociates Model-Based and Model-Free Reinforcement Learning. *Journal of Neuroscience*  
755 *36*, 1211–1222.
- 756 Egan, M.F., Goldberg, T.E., Kolachana, B.S., Callicott, J.H., Mazzanti, C.M., Straub, R.E.,  
757 Goldman, D., and Weinberger, D.R. (2001). Effect of COMT Val108/158 Met genotype on  
758 frontal lobe function and risk for schizophrenia. *Proceedings of the National Academy of*  
759 *Sciences* *98*, 6917–6922.
- 760 Frank, M.J., Moustafa, A.A., Haughey, H.M., Curran, T., and Hutchison, K.E. (2007).  
761 Genetic triple dissociation reveals multiple roles for dopamine in reinforcement learning.  
762 *Proceedings of the National Academy of Sciences* *104*, 16311–16316.

- 763 Frank, M.J., Doll, B.B., Oas-Terpstra, J., and Moreno, F. (2009). Prefrontal and striatal  
764 dopaminergic genes predict individual differences in exploration and exploitation. *Nature*  
765 *Neuroscience* 12, 1062–1068.
- 766 Gershman, S.J., and Schoenbaum, G. (2017). Rethinking dopamine prediction errors.  
767 *BioRxiv* 239731.
- 768 Goldberg, T.E., Egan, M.F., Gscheidle, T., Coppola, R., Weickert, T., Kolachana, B.S.,  
769 Goldman, D., and Weinberger, D.R. (2003). Executive Subprocesses in Working Memory:  
770 Relationship to Catechol-O-methyltransferase Val158Met Genotype and Schizophrenia. *Arch*  
771 *Gen Psychiatry* 60, 889–896.
- 772 Haith, A.M., and Krakauer, J.W. (2013). Model-Based and Model-Free Mechanisms of  
773 Human Motor Learning. In *Progress in Motor Control*, M.J. Richardson, M.A. Riley, and K.  
774 Shockley, eds. (New York, NY: Springer New York), pp. 1–21.
- 775 Holland, P.J., Codol, O., and Galea, J.M. (2018). The contribution of explicit processes to  
776 reinforcement-based motor learning. *Journal of Neurophysiology*.
- 777 Huang, V.S., Haith, A., Mazzoni, P., and Krakauer, J.W. (2011). Rethinking Motor Learning  
778 and Savings in Adaptation Paradigms: Model-Free Memory for Successful Actions Combines  
779 with Internal Models. *Neuron* 70, 787–801.
- 780 Hutter, S.A., and Taylor, J.A. (2018). Relative sensitivity of explicit re-aiming and implicit  
781 motor adaptation.
- 782 Izawa, J., and Shadmehr, R. (2011). Learning from Sensory and Reward Prediction Errors  
783 during Motor Adaptation. *PLoS Computational Biology* 7, e1002012.
- 784 Jordan, K., Heinze, H.-J., Lutz, K., Kanowski, M., and Jäncke, L. (2001). Cortical  
785 Activations during the Mental Rotation of Different Visual Objects. *NeuroImage* 13, 143–  
786 152.

- 787 Keisler, A., and Shadmehr, R. (2010). A Shared Resource between Declarative Memory and  
788 Motor Memory. *Journal of Neuroscience* 30, 14817–14823.
- 789 van der Kooij, K., and Overvliet, K.E. (2016). Rewarding imperfect motor performance  
790 reduces adaptive changes. *Experimental Brain Research* 234, 1441–1450.
- 791 Leow, L.-A., de Rugy, A., Marinovic, W., Riek, S., and Carroll, T.J. (2016). Savings for  
792 visuomotor adaptation require prior history of error, not prior repetition of successful actions.  
793 *Journal of Neurophysiology* 116, 1603–1614.
- 794 Loonis, R.F., Brincat, S.L., Antzoulatos, E.G., and Miller, E.K. (2017). A Meta-Analysis  
795 Suggests Different Neural Correlates for Implicit and Explicit Learning. *Neuron* 96, 521-  
796 534.e7.
- 797 Manley, H., Dayan, P., and Diedrichsen, J. (2014). When Money Is Not Enough: Awareness,  
798 Success, and Variability in Motor Learning. *PLoS ONE* 9, e86580.
- 799 Maxwell, J.P., Masters, R.S.W., Kerr, E., and Weedon, E. (2001). The implicit benefit of  
800 learning without errors. *The Quarterly Journal of Experimental Psychology A* 54, 1049–1068.
- 801 McNab, F., and Klingberg, T. (2008). Prefrontal cortex and basal ganglia control access to  
802 working memory. *Nature Neuroscience* 11, 103–107.
- 803 Morehead, J.R., Qasim, S.E., Crossley, M.J., and Ivry, R. (2015). Savings upon Re-Aiming in  
804 Visuomotor Adaptation. *Journal of Neuroscience* 35, 14386–14396.
- 805 Morehead, J.R., Taylor, J.A., Parvin, D., and Ivry, R.B. (2017). Characteristics of Implicit  
806 Sensorimotor Adaptation Revealed by Task-irrelevant Clamped Feedback. *Journal of*  
807 *Cognitive Neuroscience* 1–14.
- 808 Nakahara, H., and Hikosaka, O. (2012). Learning to represent reward structure: A key to  
809 adapting to complex environments. *Neuroscience Research* 74, 177–183.

- 810 Pearson-Fuhrhop, K.M., Minton, B., Acevedo, D., Shahbaba, B., and Cramer, S.C. (2013).  
811 Genetic Variation in the Human Brain Dopamine System Influences Motor Learning and Its  
812 Modulation by L-Dopa. *PLoS ONE* 8, e61197.
- 813 Pekny, S.E., Izawa, J., and Shadmehr, R. (2015). Reward-Dependent Modulation of  
814 Movement Variability. *Journal of Neuroscience* 35, 4015–4024.
- 815 Peters, M., and Battista, C. (2008). Applications of mental rotation figures of the Shepard and  
816 Metzler type and description of a mental rotation stimulus library. *Brain and Cognition* 66,  
817 260–264.
- 818 Quattrocchi, G., Monaco, J., Ho, A., Irmen, F., Strube, W., Ruge, D., Bestmann, S., and  
819 Galea, J.M. (2018). Pharmacological Dopamine Manipulation Does Not Alter Reward-Based  
820 Improvements in Memory Retention during a Visuomotor Adaptation Task. *Eneuro* 5,  
821 ENEURO.0453-17.2018.
- 822 Shepard, R., N., and Metzler, J. (1971). Mental Rotation of Three-Dimensional Objects.  
823 *Science* 171, 701–703.
- 824 Shmuelof, L., Huang, V.S., Haith, A.M., Delnicki, R.J., Mazzoni, P., and Krakauer, J.W.  
825 (2012). Overcoming Motor “Forgetting” Through Reinforcement Of Learned Actions.  
826 *Journal of Neuroscience* 32, 14617-14621a.
- 827 Sidarta, A., van Vugt, F., and Ostry, D.J. (2018). Somatosensory Working Memory in Human  
828 Reinforcement-Based Motor Learning. *Journal of Neurophysiology* 41.
- 829 Suchan, B., Botko, R., Gizewski, E., Forsting, M., and Daum, I. (2006). Neural substrates of  
830 manipulation in visuospatial working memory. *Neuroscience* 139, 351–357.
- 831 Sutton, R.S., and Barto, A. (1998). *Reinforcement Learning: An Introduction* (Cambridge,  
832 Mass: A Bradford Book).

- 833 Taylor, J.A., and Ivry, R.B. (2011). Flexible Cognitive Strategies during Motor Learning.  
834 PLoS Computational Biology 7, e1001096.
- 835 Taylor, J.A., and Ivry, R.B. (2014). Cerebellar and Prefrontal Cortex Contributions to  
836 Adaptation, Strategies, and Reinforcement Learning. In Progress in Brain Research,  
837 (Elsevier), pp. 217–253.
- 838 The 1000 Genomes Project Consortium, Gibbs, R.A., Boerwinkle, E., Doddapaneni, H., Han,  
839 Y., Korchina, V., Kovar, C., Lee, S., Muzny, D., Reid, J.G., et al. (2015). A global reference  
840 for human genetic variation. Nature 526, 68–74.
- 841 Therrien, A.S., Wolpert, D.M., and Bastian, A.J. (2016). Effective reinforcement learning  
842 following cerebellar damage requires a balance between exploration and motor noise. Brain  
843 139, 101–114.
- 844 Therrien, A.S., Wolpert, D.M., and Bastian, A.J. (2018). Increasing Motor Noise Impairs  
845 Reinforcement Learning in Healthy Individuals. Eneuro 5, ENEURO.0050-18.2018.
- 846 Tseng, Y. -w., Diedrichsen, J., Krakauer, J.W., Shadmehr, R., and Bastian, A.J. (2007).  
847 Sensory Prediction Errors Drive Cerebellum-Dependent Adaptation of Reaching. Journal of  
848 Neurophysiology 98, 54–62.
- 849
